# Supplementary material for: Effect of Hyperthyroidism Treatments on Heart Rate Variability: A Systematic Review and Meta-Analysis
Source: MDPI journal article supplement (doi:10.3390/biomedicines10081982), 2022-08-16
Supplement: s1 [file s1]

**Figure S5.** Detailed meta-analysis in treated hyperthyroid patients compared with untreated for each HRV parameters: RR intervals, SDNN, RMSSD, pNN50, TP, LF, HF, VLF, LF/HF

RR: RR intervals (or normal-to-normal intervals-NNs), SMD: standardised mean differences (effect size)

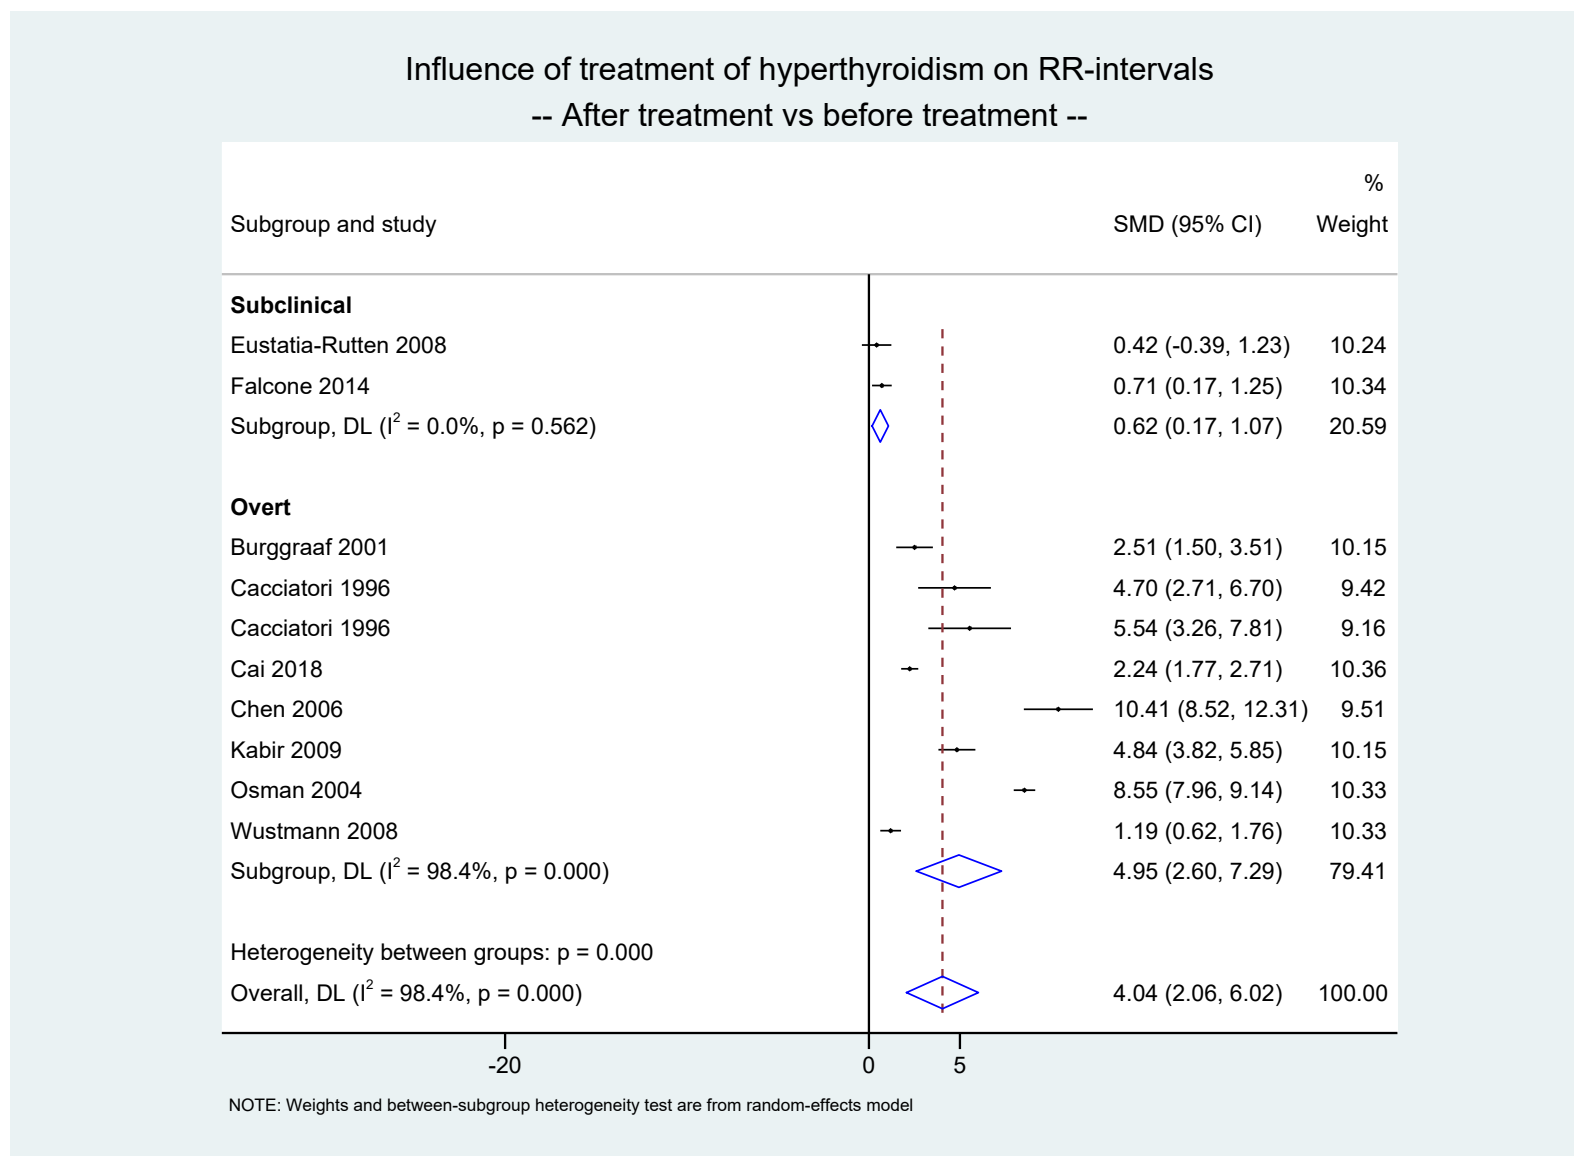

SDNN: standard deviation of RR intervals; SMD: standardised mean differences (effect size)

### Influence of treatment of hyperthyroidism on SDNN -- After treatment vs before treatment --

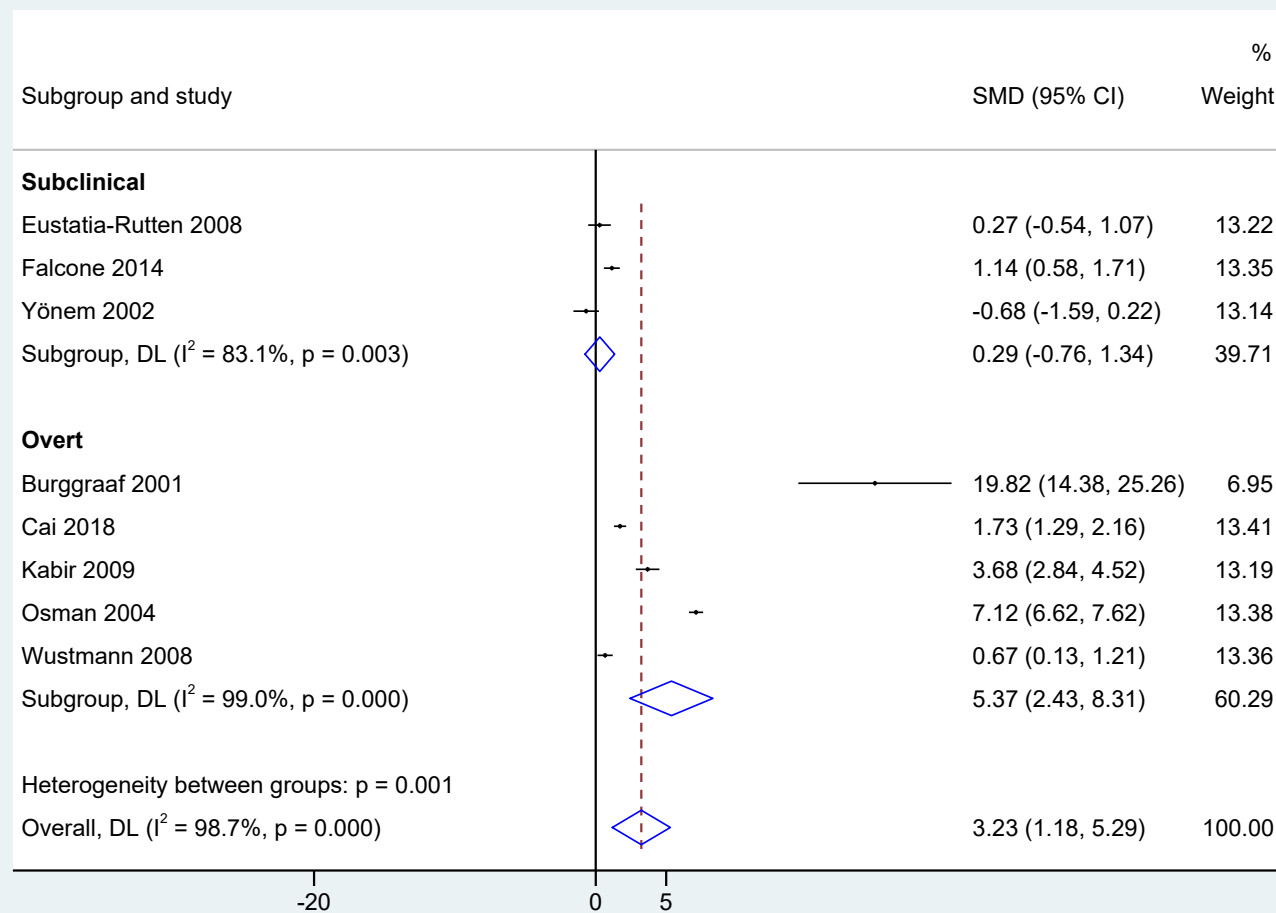

NOTE: Weights and between-subgroup heterogeneity test are from random-effects model

RMSSD: the square root of the mean squared difference of successive RR-intervals; SMD: standardised mean differences (effect size)

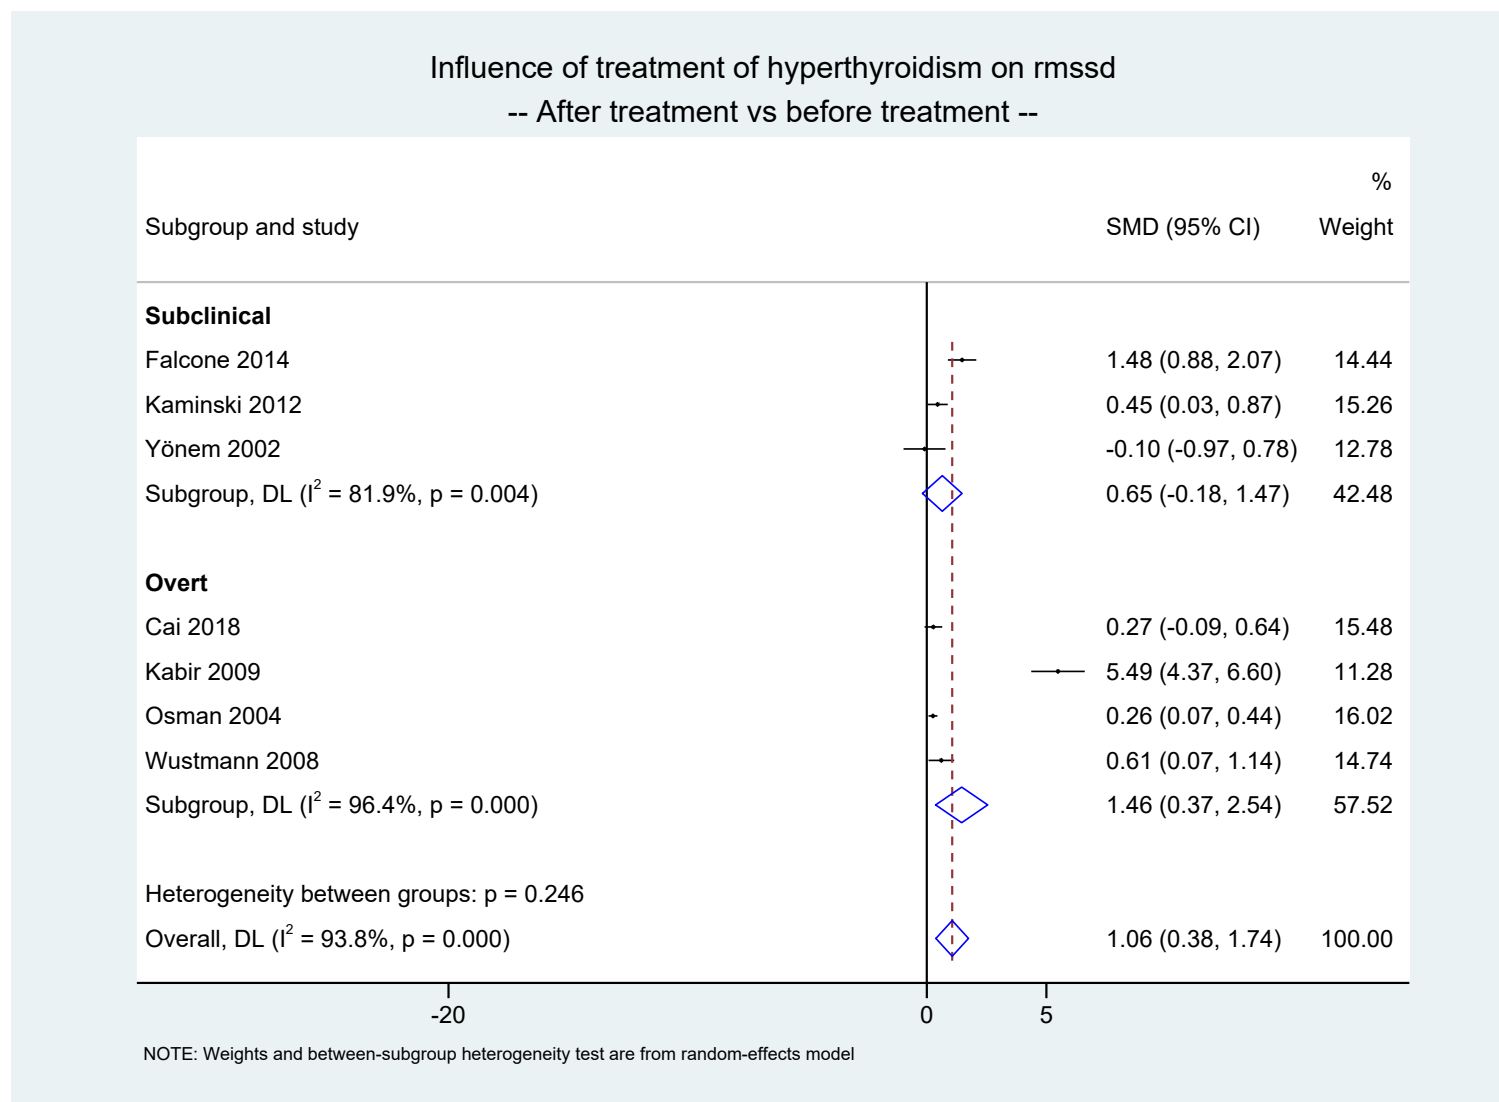

*pNN50: percentage of adjacent NN intervals differing by more than 50 milliseconds, SMD: standardised mean differences (effect size)*

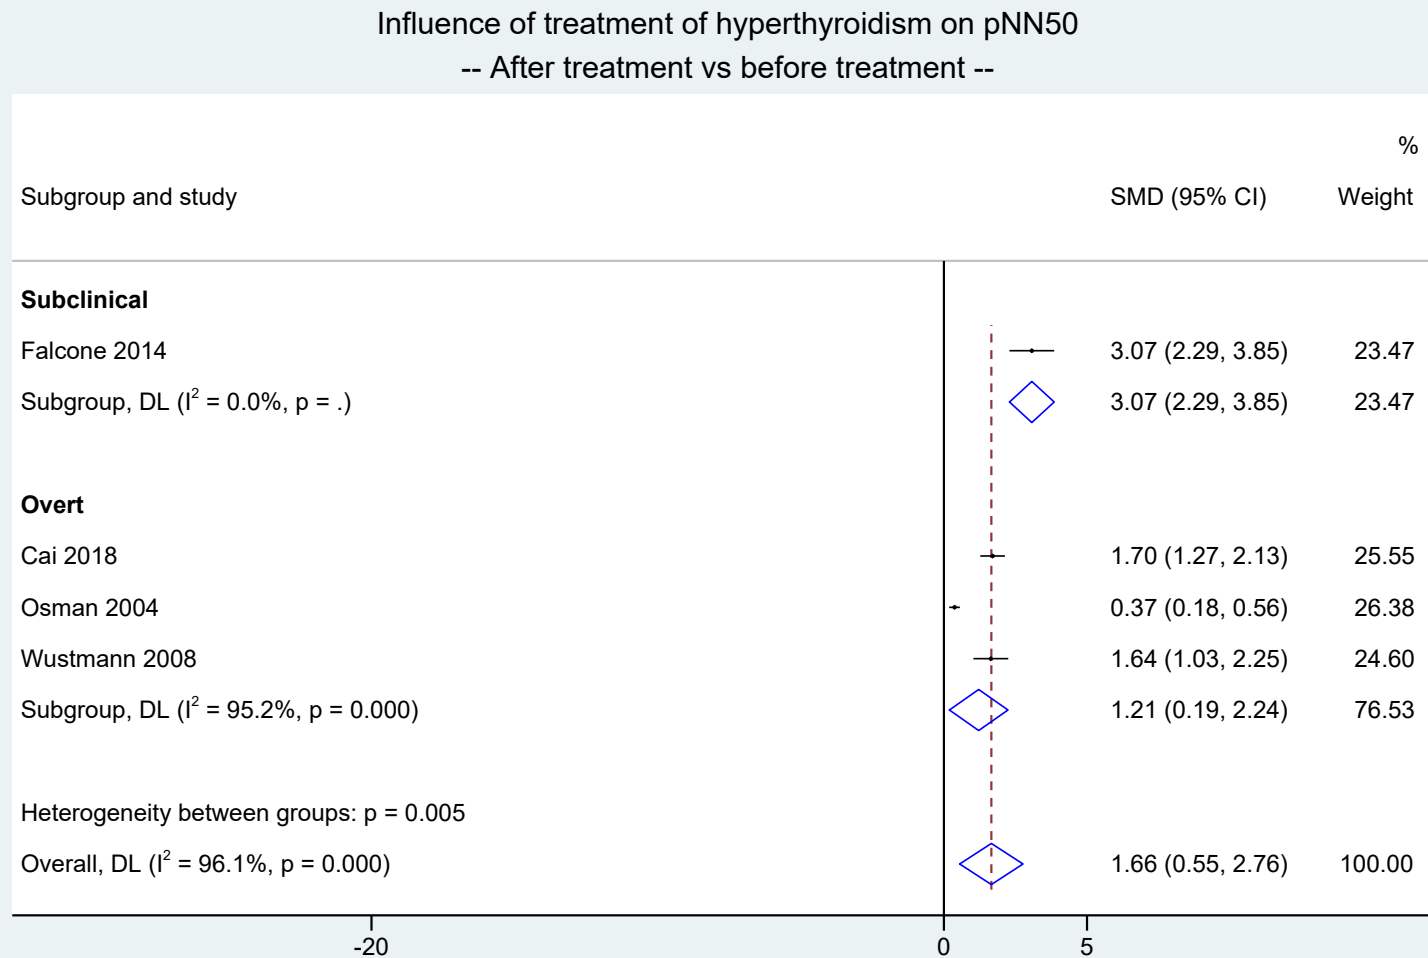

NOTE: Weights and between-subgroup heterogeneity test are from random-effects model

SMD: standardised mean differences (effect size)

Influence of treatment of hyperthyroidism on Total power  
-- After treatment vs before treatment --

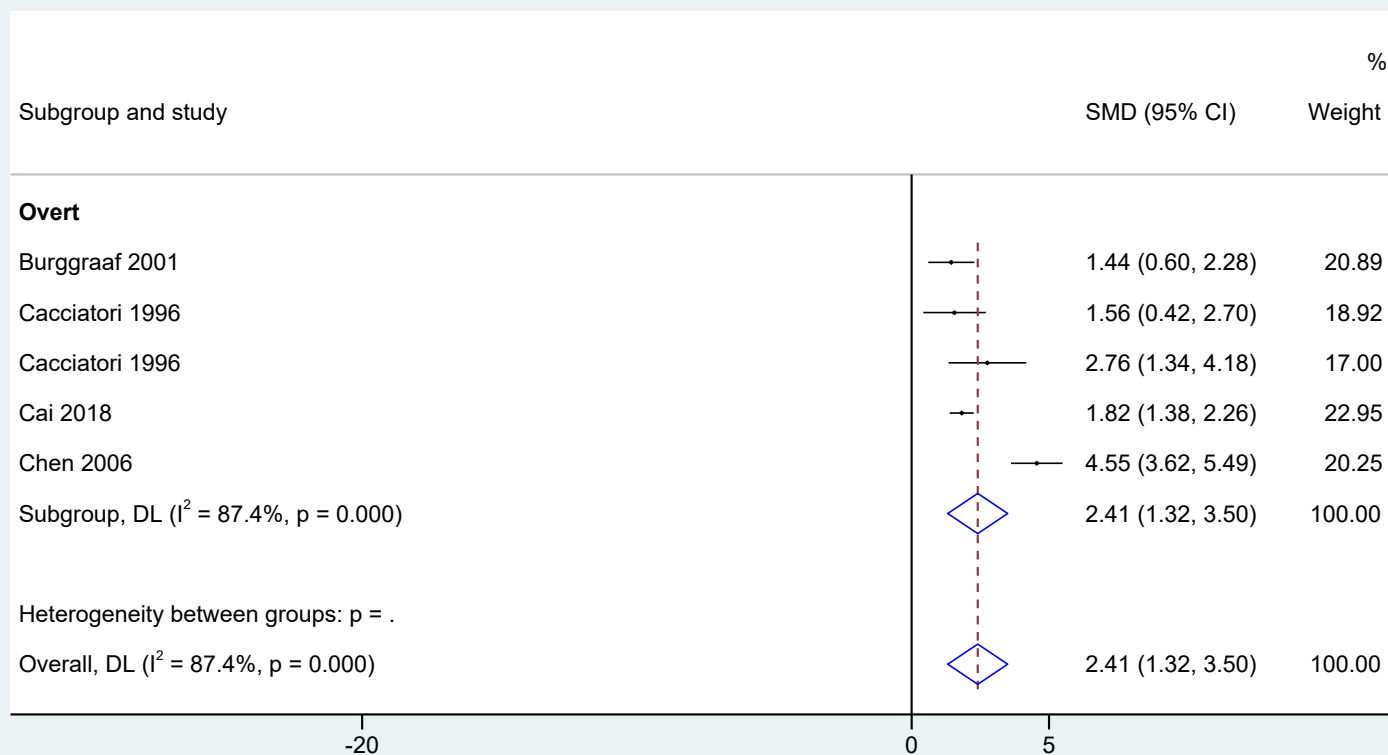

NOTE: Weights are from random-effects model

LF: low frequency; LFnu: low frequency normalized – units, SMD: standardised mean differences (effect size)

Influence of treatment of hyperthyroidism on LF ms2  
-- After treatment vs before treatment --

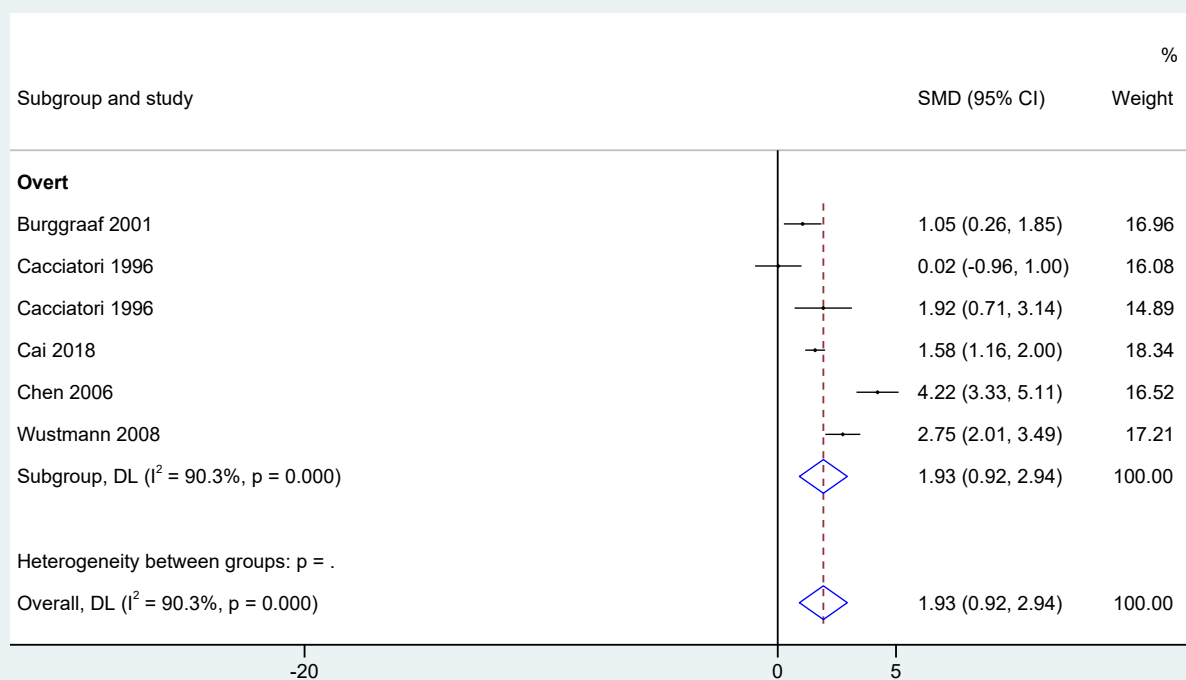

Influence of treatment of hyperthyroidism on LF nu  
-- After treatment vs before treatment --

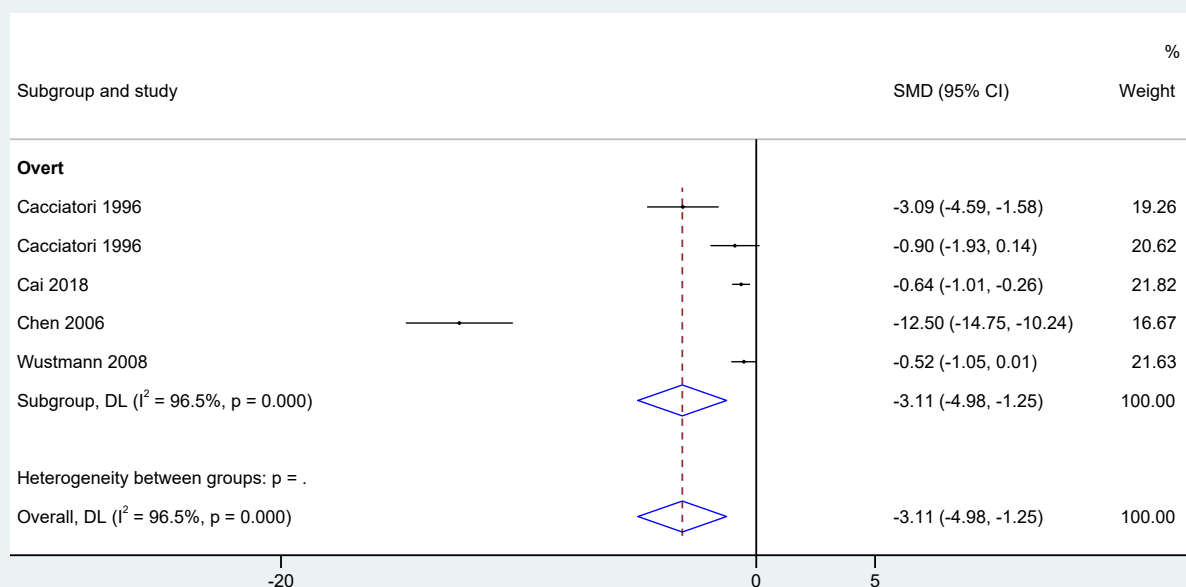

NOTE: Weights are from random-effects model

HF: high frequency; HFnu: high frequency – normalized units; SMD: standardised mean differences(effect size)

### Influence of treatment of hyperthyroidism on HF ms2

-- After treatment vs before treatment --

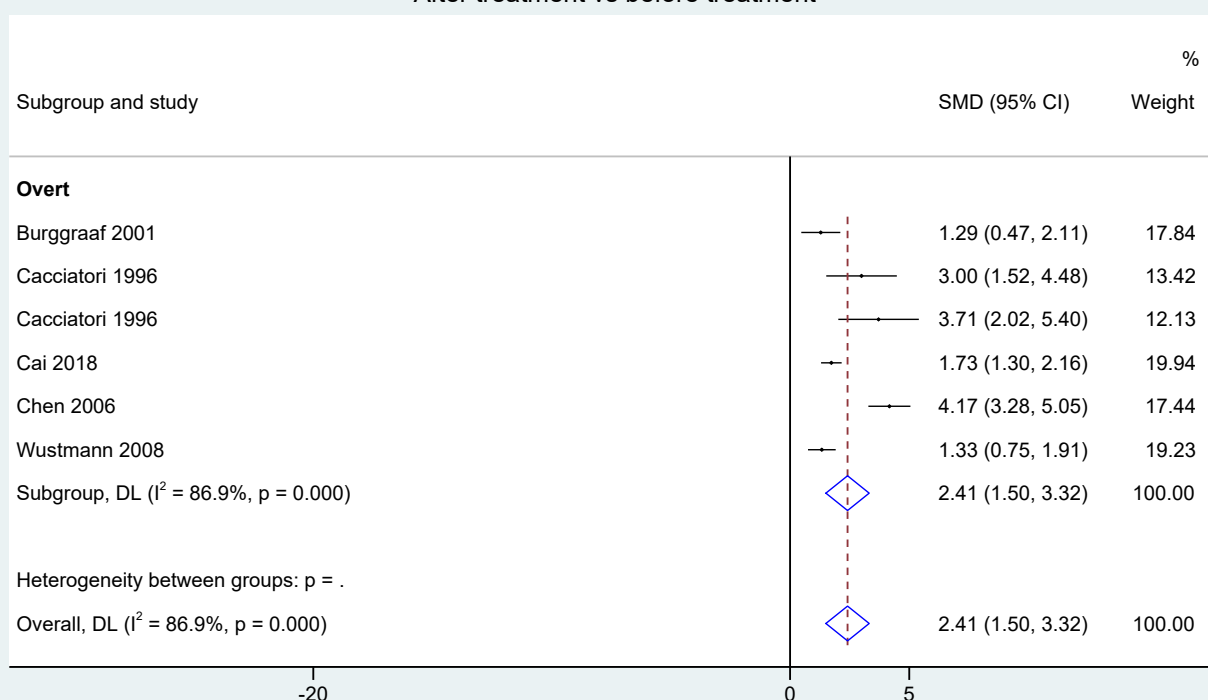

### Influence of treatment of hyperthyroidism on HF nu

-- After treatment vs before treatment --

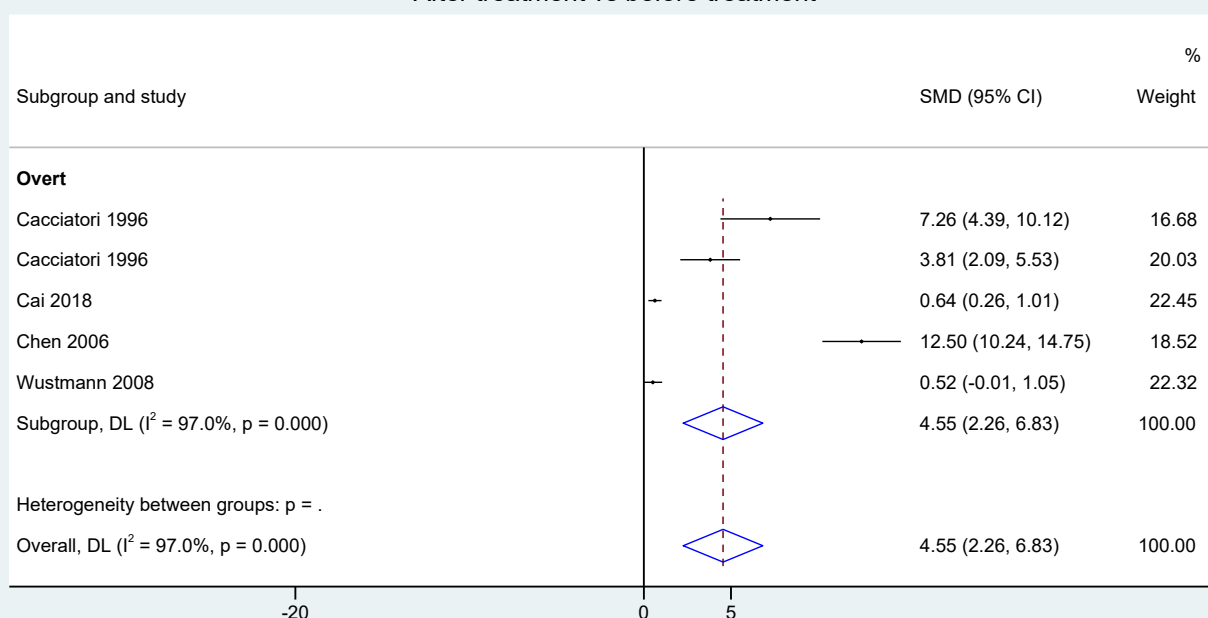

NOTE: Weights are from random-effects model

VLF: very low frequency; SMD: standardised mean differences (effect size)

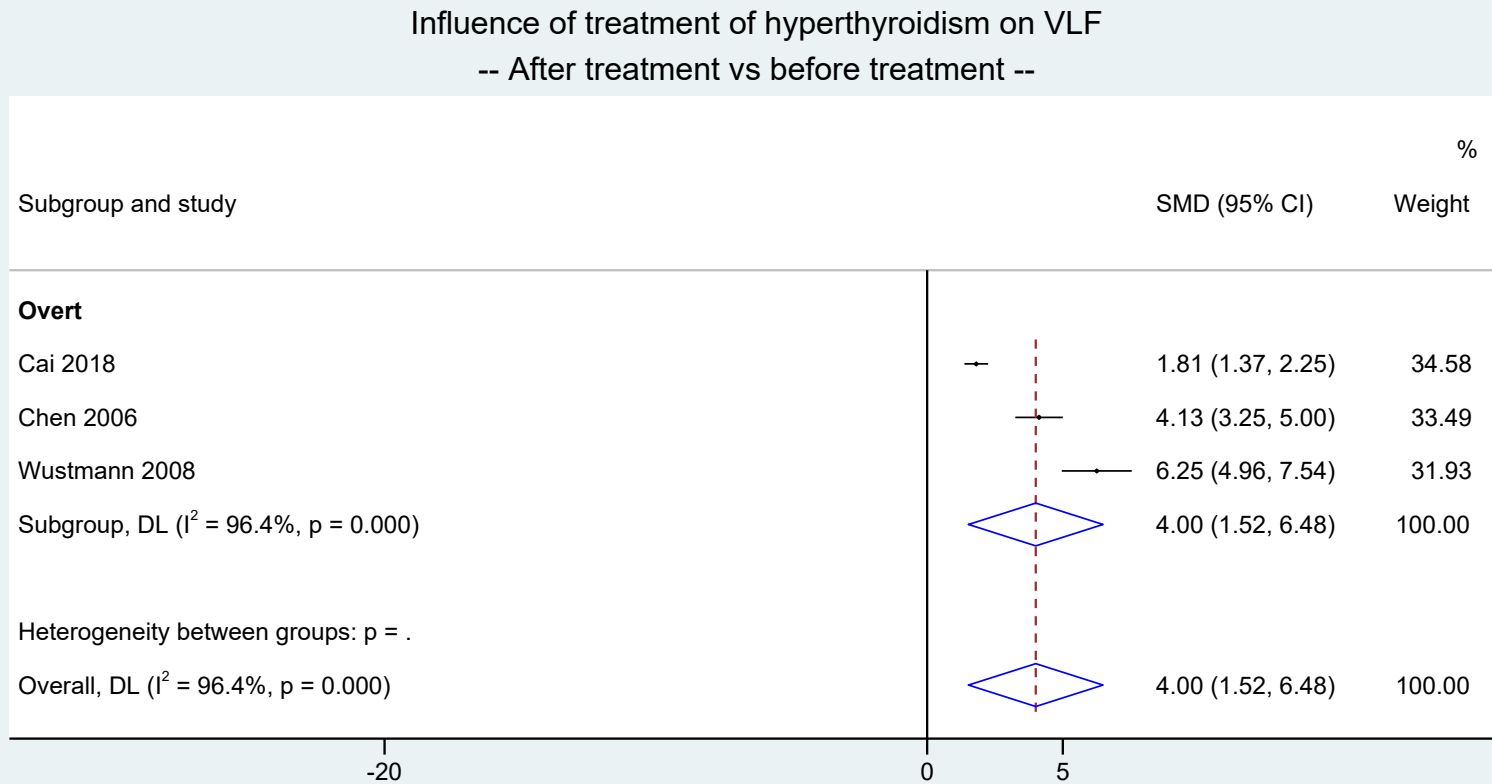

NOTE: Weights are from random-effects model



LF/HF ratio: low frequency / high frequency ratio; SMD: standardised mean differences (effect size)

Influence of treatment of hyperthyroidism on LF/HF  
-- After treatment vs before treatment --

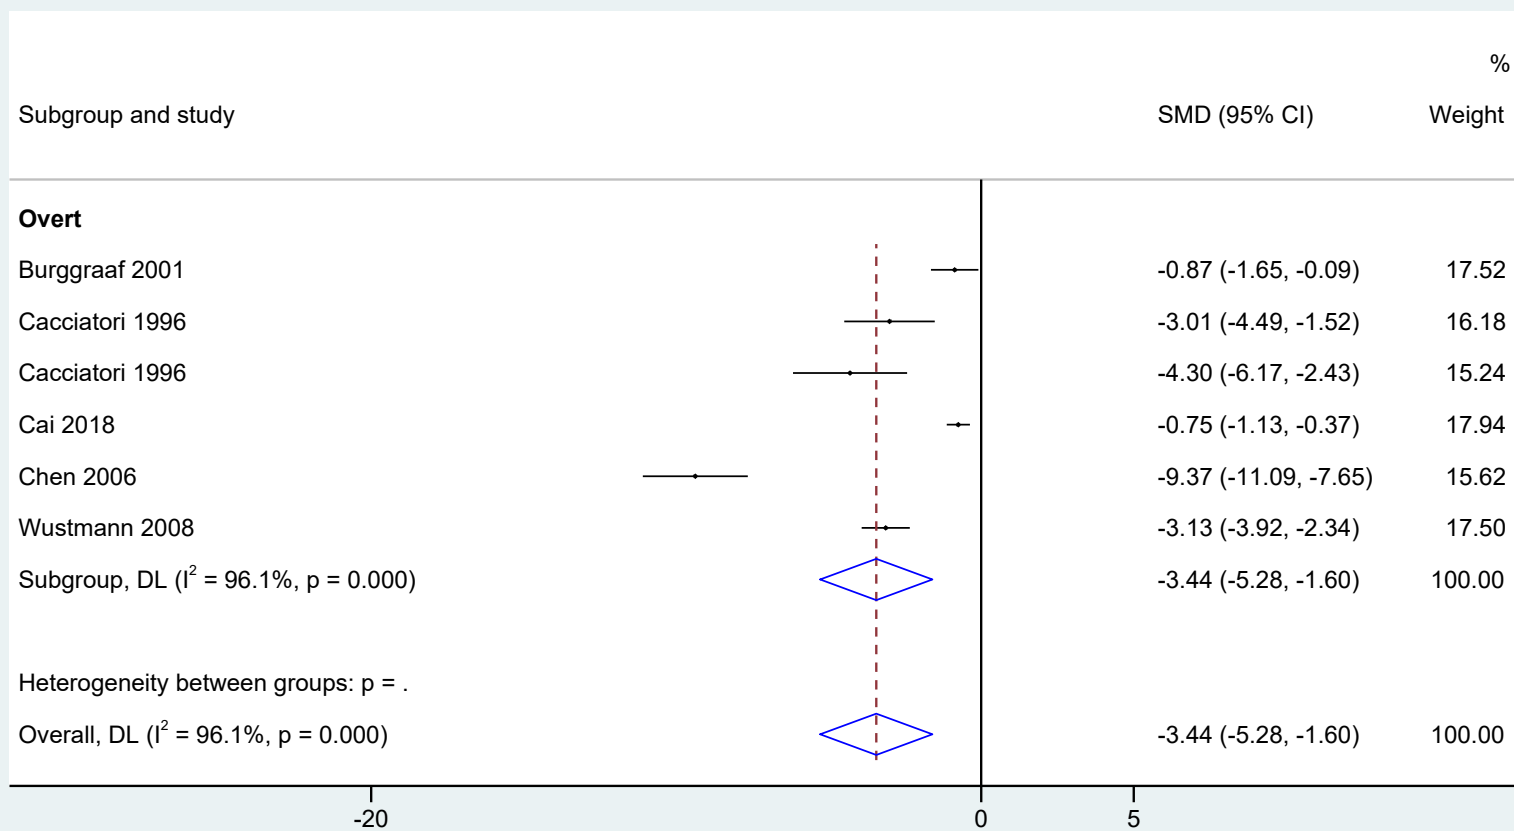

NOTE: Weights are from random-effects model
