# Supplementary material for: Effect of Hyperthyroidism Treatments on Heart Rate Variability: A Systematic Review and Meta-Analysis
Source: MDPI journal article supplement (doi:10.3390/biomedicines10081982), 2022-08-16
Supplement: s1 [file s1]

**Figure S1.** Details for the search strategy used within each database

**Pubmed**

(hyperthyroidism[TW] OR hyperthyroid[TW]) AND ("heart rate variability"[TW] OR HRV[TW])

Filter Language = 0

Filter Dates = 0

<https://pubmed.ncbi.nlm.nih.gov/?term=%28hyperthyroidism%5BTW%5D+OR+hyperthyroid%5BTW%5D%29+AND+%28%22heart+rate+variability%22%5BTW%5D+OR+HRV%5BTW%5D%29>

**= 35 articles**

**Cochrane Library**

("hyperthyroidism" OR "hyperthyroid") AND ("heart rate variability" OR "HRV")

In All Text

Filter Language = 0

Filter Dates = 0

[https://www.cochranelibrary.com/search?p\\_p\\_id=solarissearchresultsportlet\\_WAR\\_solarissearchresults&p\\_p\\_lifecycle=0&\\_solarissearchresultsportlet\\_WAR\\_solarissearchresults\\_searchType=basic&\\_solarissearchresultsportlet\\_WAR\\_solarissearchresults\\_searchBy=6&\\_solarissearchresultsportlet\\_WAR\\_solarissearchresults\\_searchText=%28%22hyperthyroidism%22%29+OR+%22hyperthyroid%22%29++AND++%28%22heart+rate+variability%22%29+OR+%22HRV%22%29](https://www.cochranelibrary.com/search?p_p_id=solarissearchresultsportlet_WAR_solarissearchresults&p_p_lifecycle=0&_solarissearchresultsportlet_WAR_solarissearchresults_searchType=basic&_solarissearchresultsportlet_WAR_solarissearchresults_searchBy=6&_solarissearchresultsportlet_WAR_solarissearchresults_searchText=%28%22hyperthyroidism%22%29+OR+%22hyperthyroid%22%29++AND++%28%22heart+rate+variability%22%29+OR+%22HRV%22%29)

**= 8 articles**

**Embase**

('hyperthyroidism'/exp OR 'hyperthyroid'/exp) AND ('heart rate variability'/exp OR 'HRV'/exp)

Filter Language = 0

Filter Dates = 0

**= 76 articles**

**Google Scholar**

("hyperthyroidism" OR "hyperthyroid") AND ("heart rate variability" OR "HRV")

Filter Language = 0

Filter Dates = 0

In Journal articles

[https://scholar.google.fr/scholar?q=\(%28hyperthyroidism%22%29+OR+%22hyperthyroid%22%29+++AND+++%28%22heart+rate+variability%22%29+OR+%22HRV%22%29\)&hl=fr&as\\_sdt=0,5&as\\_vis=1&as\\_rr=1](https://scholar.google.fr/scholar?q=(%28hyperthyroidism%22%29+OR+%22hyperthyroid%22%29+++AND+++%28%22heart+rate+variability%22%29+OR+%22HRV%22%29)&hl=fr&as_sdt=0,5&as_vis=1&as_rr=1)

**= 519 articles**
