# Supplementary figures and images for: Effect of Hyperthyroidism Treatments on Heart Rate Variability: A Systematic Review and Meta-Analysis
Source: MDPI journal article supplement (doi:10.3390/biomedicines10081982), 2022-08-16

**Figure S2.** Methodological quality of included studies using the SIGN check

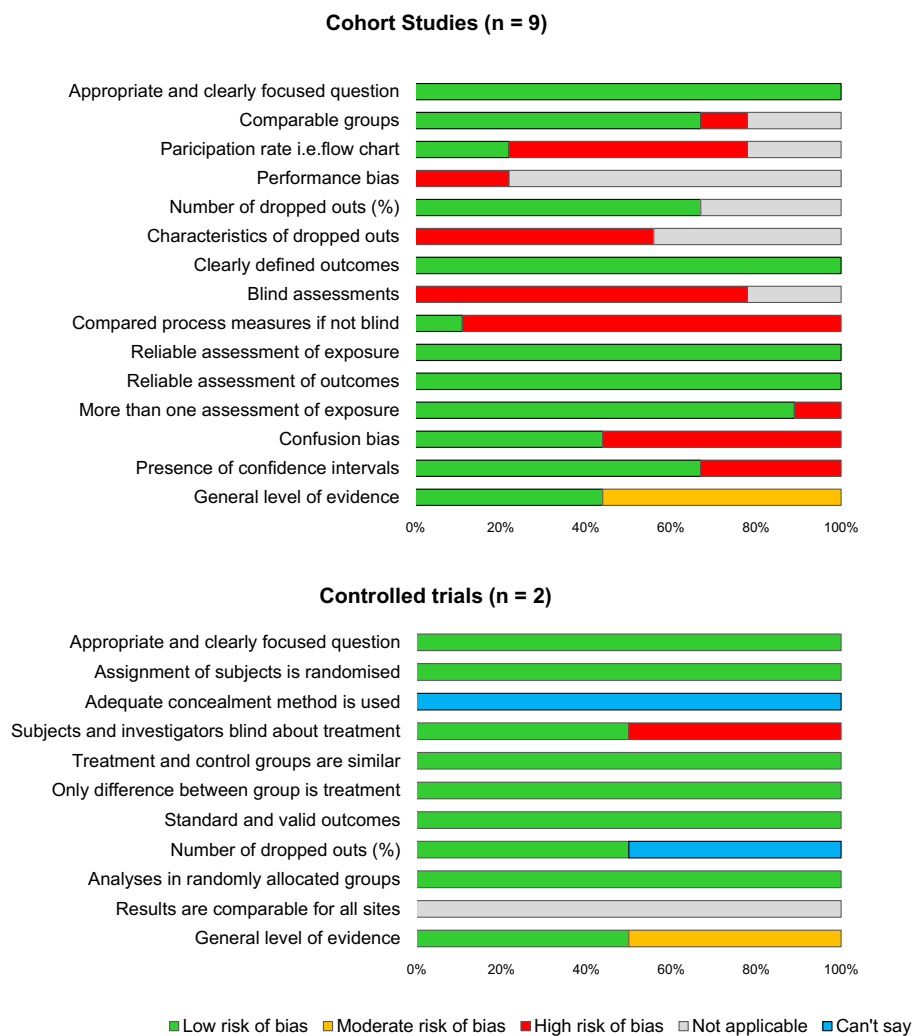

Supplement: s1 [file s1]
